# Supplementary material
Source: PubMed Central journal article supplement (PMC3024600)
Supplement: NIHMS260213-supplement-Supporting_Information.pdf [file NIHMS260213-supplement-Supporting_Information.pdf]

*Supporting Information for Small*

**Surface properties dictate uptake, distribution, excretion, and toxicity of nanoparticles in fish**

*Zheng-Jiang Zhu,<sup>†</sup> Rachel Carboni,<sup>‡</sup> Michael Quercio,<sup>‡</sup> Bo Yan,<sup>†</sup> Oscar R. Miranda,<sup>†</sup> Douglas L. Anderton,<sup>§</sup> Kathleen F. Arcaro,<sup>\*,‡</sup> Vincent M. Rotello,<sup>\*,†</sup> and Richard W. Vachet<sup>\*,†</sup>*

<sup>†</sup>Department of Chemistry, <sup>‡</sup>Department of Veterinary and Animal Sciences, and <sup>§</sup>Department of Sociology, University of Massachusetts, Amherst, USA, 01003

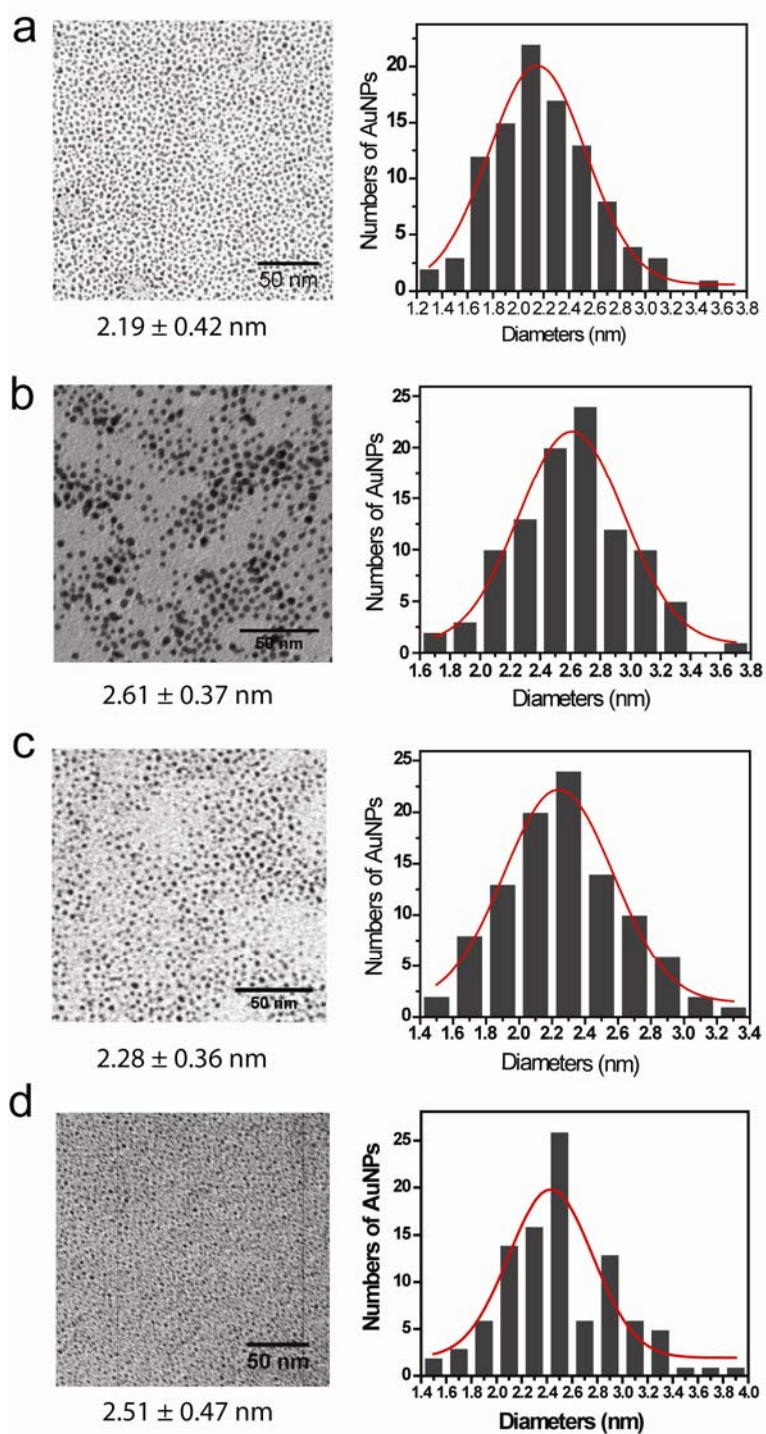

**Figure S1. TEM images and size distributions of AuNPs. a, AuNP 1; b, AuNP 2; c, AuNP 3; d, AuNP 4.** The size distributions are shown in the right panels as histograms and fitted Gaussian curves (red line). In each histogram, 100 nanoparticles were randomly measured.

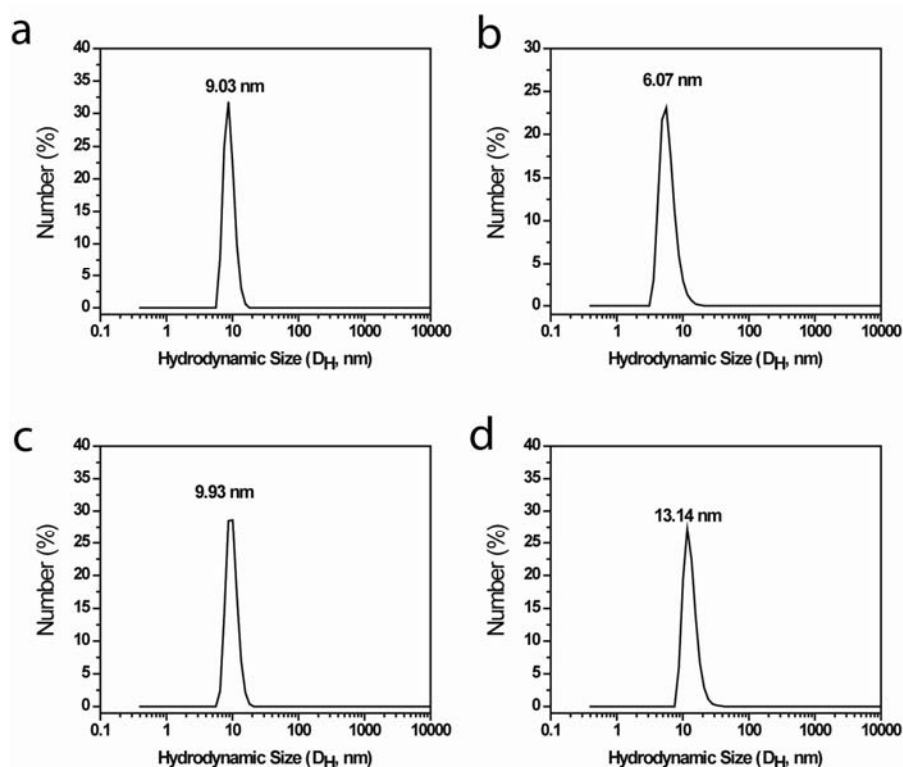

**Figure S2. Hydrodynamic sizes of AuNPs in conditioned water.** a, AuNP 1; b, AuNP 2; c, AuNP 3; d, AuNP 4.

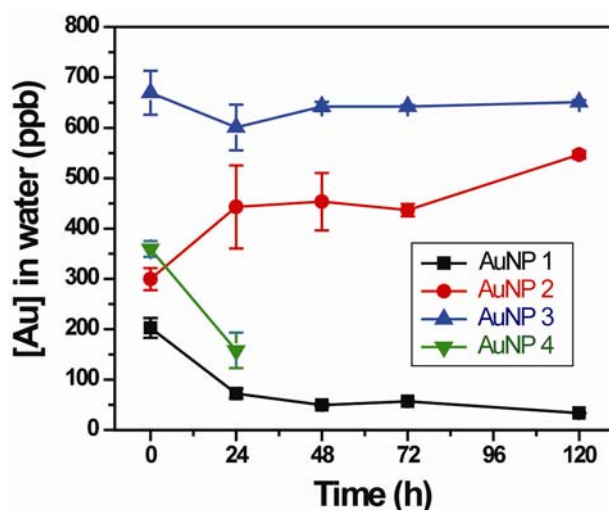

**Figure S3. Au concentration in tank water during the course of the exposure experiments.** A single dose of 20 nM AuNPs was added to the water tank 30-60 minutes before adding the fish. During this 30-60 minute period, the water was aerated via an air-stone. During the aeration period, some of the AuNPs stick to the surface of the fish tanks, causing a drop in the total Au concentration. The time when the fish are added to the tank was set as 0 h. Aliquots (5 mL) of water were taken at 0, 24, 48, 72, and 120 h and analyzed by ICP-MS. Means in the figure are obtained from 3-6 measurements, and the errors bars represent the standard error of the mean.

**Table S1. Biodistribution of AuNPs 1-3 in fish organs at 24 hr.**

| Organs     | Control <sup>#</sup> | AuNP 1 <sup>#</sup> | p <sup>&amp;</sup> | AuNP 2 <sup>#</sup> | p <sup>&amp;</sup> | AuNP 3 <sup>#</sup> | p <sup>&amp;</sup> |
|------------|----------------------|---------------------|--------------------|---------------------|--------------------|---------------------|--------------------|
|            | Au (ng/mg)           | Au (ng/mg)          |                    | Au (ng/mg)          |                    | Au (ng/mg)          |                    |
| Brain      | 0.35 ± 0.14          | 1.10 ± 0.49         | 0.162              | 0.27 ± 0.08         | 0.609              | 0.20 ± 0.04         | 0.186              |
| Heart      | 2.28 ± 1.11          | 19.0 ± 9.59         | 0.106              | 5.03 ± 3.68         | 0.485              | 1.57 ± 0.77         | 0.610              |
| liver      | 0.19 ± 0.09          | 1.12 ± 0.57         | 0.126              | 0.22 ± 0.09         | 0.777              | 0.18 ± 0.04         | 0.924              |
| Gonad      | 0.13 ± 0.05          | 12.1 ± 11.1         | 0.298              | 0.18 ± 0.08         | 0.573              | 0.09 ± 0.03         | 0.469              |
| Dorsal fin | 1.35 ± 0.76          | 1.03 ± 0.19         | 0.684              | 3.41 ± 2.69         | 0.472              | 0.76 ± 0.32         | 0.485              |
| Gill       | 0.24 ± 0.09          | 5.07 ± 1.38         | 0.004              | 0.53 ± 0.11         | 0.054              | 0.16 ± 0.03         | 0.423              |
| Intestine  | 0.12 ± 0.05          | 35.2 ± 9.10         | 0.002              | 8.15 ± 3.19         | 0.025              | 7.35 ± 3.68         | 0.070              |

<sup>#</sup> The concentration unit refers to ng of Au per mg of organ weight; means are averaged from eight fish (n=8), and the errors are reported as the standard error of the mean. <sup>&</sup> p-value of one-way ANOVA between control and AuNP treated groups.

**Table S2. Biodistribution of AuNPs 1-3 in fish organs at 72 hr.**

| Organs     | Control <sup>#</sup> | AuNP 1 <sup>#</sup> | p <sup>&amp;</sup> | AuNP 2 <sup>#</sup> | p <sup>&amp;</sup> | AuNP 3 <sup>#</sup> | p <sup>&amp;</sup> |
|------------|----------------------|---------------------|--------------------|---------------------|--------------------|---------------------|--------------------|
|            | Au (ng/mg)           | Au (ng/mg)          |                    | Au (ng/mg)          |                    | Au (ng/mg)          |                    |
| Brain      | 0.47 ± 0.16          | 0.72 ± 0.26         | 0.240              | 0.54 ± 0.16         | 0.399              | 0.22 ± 0.08         | 0.409              |
| Heart      | 5.45 ± 2.72          | 14.66 ± 7.27        | 0.115              | 3.41 ± 1.27         | 0.512              | 1.43 ± 0.41         | 0.484              |
| liver      | 0.46 ± 0.18          | 0.74 ± 0.27         | 0.074              | 0.23 ± 0.08         | 0.736              | 0.17 ± 0.07         | 0.866              |
| Gonad      | 0.30 ± 0.15          | 1.45 ± 0.55         | 0.032              | 0.51 ± 0.27         | 0.195              | 0.54 ± 0.31         | 0.207              |
| Dorsal fin | 1.38 ± 0.69          | 5.21 ± 2.06         | 0.100              | 1.35 ± 0.51         | 0.999              | 0.62 ± 0.17         | 0.364              |
| Gill       | 0.25 ± 0.12          | 2.17 ± 0.42         | 0.0005             | 0.63 ± 0.08         | 0.005              | 0.33 ± 0.09         | 0.437              |
| Intestine  | 0.08 ± 0.02          | 144 ± 25.6          | 0.00006            | 11.19 ± 2.75        | 0.0013             | 40.85 ± 13.71       | 0.010              |

<sup>#</sup> The concentration unit refers to ng of Au per mg of organ weight; means are averaged from eight fish (n=8), and the errors are reported as the standard error of the mean. <sup>&</sup> p-value of one-way ANOVA between control and AuNP treated groups.

**Table S3. Biodistribution of AuNPs 1-3 in fish organs at 120 hr.**

| Organs     | Control <sup>#</sup> | AuNP 1 <sup>#</sup> | p <sup>&amp;</sup> | AuNP 2 <sup>#</sup> | p <sup>&amp;</sup> | AuNP 3 <sup>#</sup> | p <sup>&amp;</sup> |
|------------|----------------------|---------------------|--------------------|---------------------|--------------------|---------------------|--------------------|
|            | Au (ng/mg)           | Au (ng/mg)          |                    | Au (ng/mg)          |                    | Au (ng/mg)          |                    |
| Brain      | 0.15 ± 0.06          | 0.34 ± 0.07         | 0.091              | 0.09 ± 0.01         | 0.364              | 0.04 ± 0.02         | 0.138              |
| Heart      | 0.77 ± 0.32          | 3.63 ± 2.83         | 0.355              | 0.41 ± 0.10         | 0.324              | 1.03 ± 0.35         | 0.618              |
| liver      | 0.05 ± 0.03          | 0.32 ± 0.20         | 0.226              | 0.11 ± 0.04         | 0.308              | 0.15 ± 0.05         | 0.168              |
| Gonad      | 0.08 ± 0.06          | 0.09 ± 0.03         | 0.889              | 0.08 ± 0.03         | 0.910              | 0.23 ± 0.11         | 0.260              |
| Dorsal fin | 0.27 ± 0.14          | 2.18 ± 1.15         | 0.151              | 1.11 ± 0.50         | 0.154              | 0.47 ± 0.29         | 0.566              |
| Gill       | 0.10 ± 0.04          | 1.09 ± 0.08         | 0.00003            | 0.48 ± 0.09         | 0.008              | 0.24 ± 0.03         | 0.021              |
| Intestine  | 0.03 ± 0.01          | 75.4 ± 21.6         | 0.013              | 9.95 ± 3.00         | 0.017              | 13.3 ± 7.29         | 0.118              |

<sup>#</sup> The concentration unit refers to ng of Au per mg of organ weight; means are averaged from eight fish (n=8), and the errors are reported as the standard error of the mean. <sup>&</sup> p-value of one-way ANOVA between control and AuNP treated groups.

**Table S4. Biodistribution of AuNP 4 in fish organs.**

| Organs     | AuNP 4 <sup>#</sup> |                    |
|------------|---------------------|--------------------|
|            | Au (ng/mg)          | p <sup>&amp;</sup> |
| Brain      | 1.29 ± 0.15         | 0.0004             |
| Heart      | 15.95 ± 5.27        | 0.024              |
| liver      | 0.99 ± 0.23         | 0.006              |
| Gonad      | 6.05 ± 3.97         | 0.159              |
| Dorsal fin | 14.30 ± 3.44        | 0.002              |
| Gill       | 25.45 ± 5.71        | 0.0004             |
| Intestine  | 0.86 ± 0.29         | 0.026              |

“#” and “&” are the same as in Tables S1, S2, and S3. All of the fish died in 24 hrs after exposure to AuNP 4.
